# Supplementary material for: Synthesis of a light-harvesting ruthenium porphyrin complex substituted with BODIPY units. Implications for visible light-promoted catalytic oxidations
Source: Royal Society of Chemistry journal article supplement (doi:10.1039/d1nj00189b), 2021-01-01
Supplement: d1nj00189b1.pdf [file d1nj00189b1.pdf]

## Supplementary Materials

# Synthesis of a light-harvesting ruthenium porphyrin complex substituted with BODIPY units. Implications for visible light-promoted catalytic oxidations

Jonathan Malone, Seth Klaine, Christian Alcantar, Fox Bratcher, and Rui Zhang\*

*Department of Chemistry, Western Kentucky University, 1906 College Heights Blvd  
#11079, Bowling Green, KY 42101-1079*

### Contents

Characterization spectra S1-S7 for compounds **1-3**.....Pages 2-5

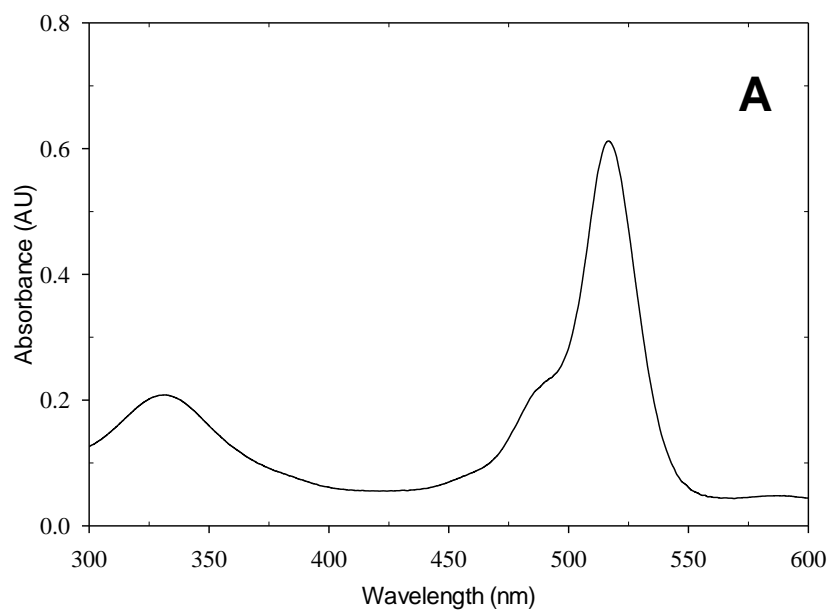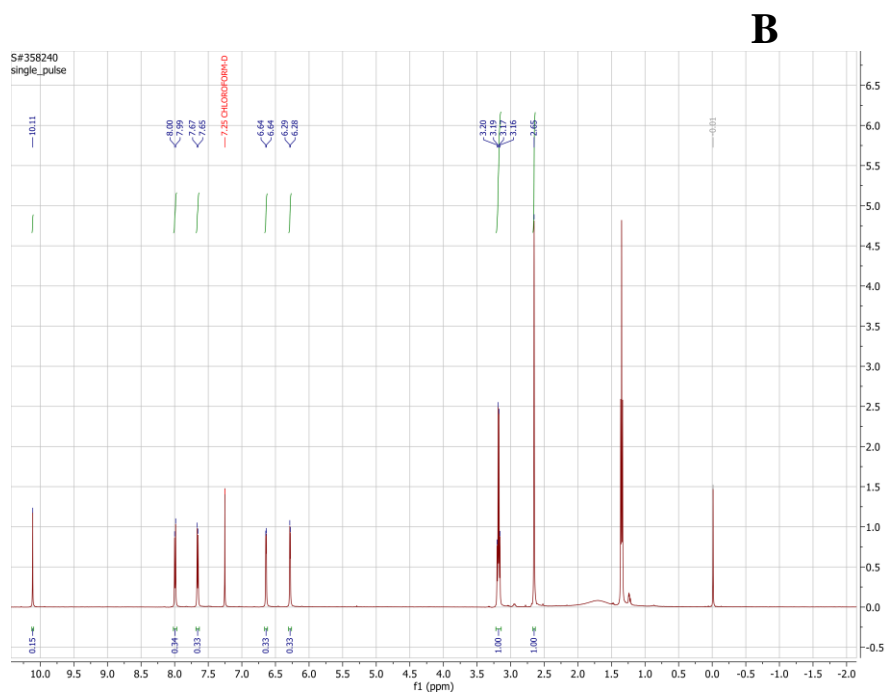

**Figure S1.** (A) UV-Vis spectrum of the BODIPY-appended benzaldehyde (**2**) in  $\text{CH}_2\text{Cl}_2$  and (B)  $^1\text{H}$ -NMR spectrum of **2** in  $\text{CDCl}_3$ .

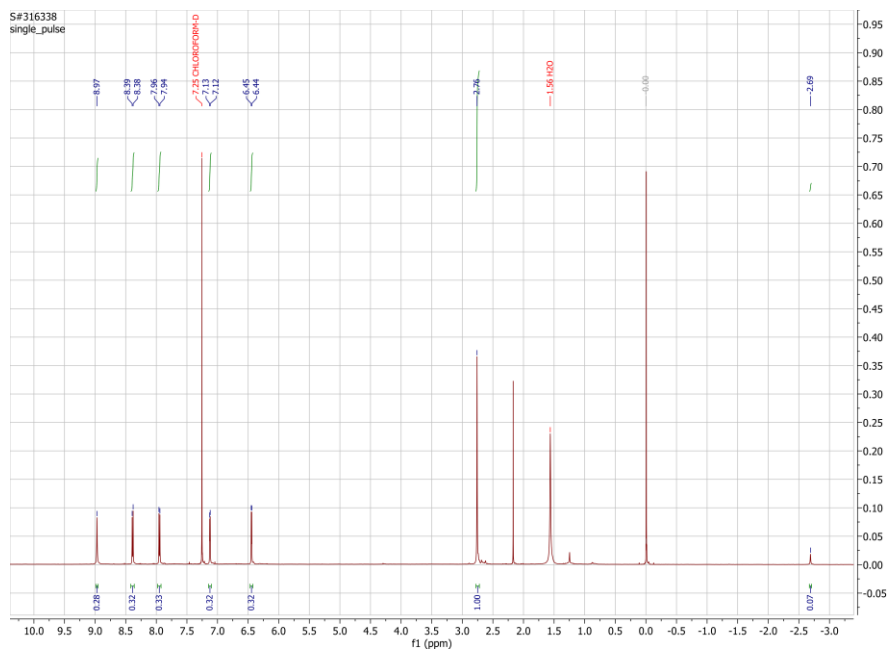

**Figure S2.**  $^1\text{H}$ -NMR spectrum of the light-harvesting porphyrin (**3**) in  $\text{CDCl}_3$

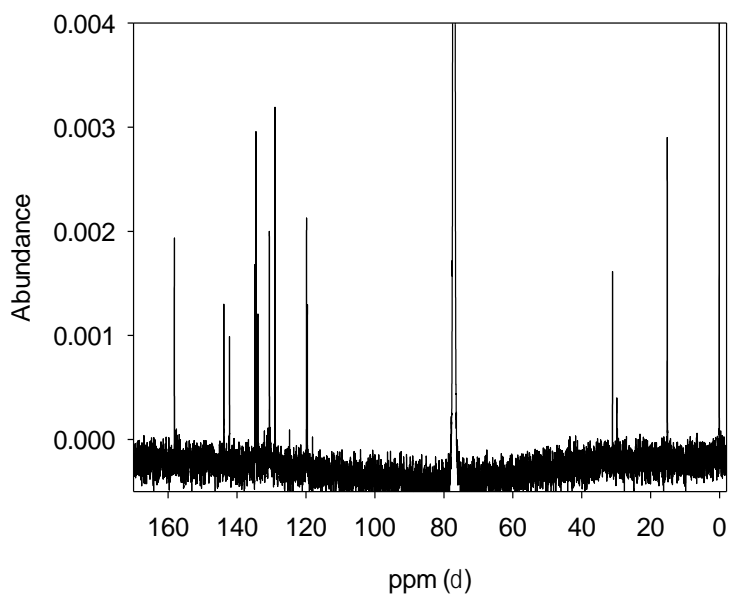

**Figure S3.**  $^{13}\text{C}$ -NMR spectrum of the light-harvesting porphyrin (**3**) in  $\text{CDCl}_3$ .

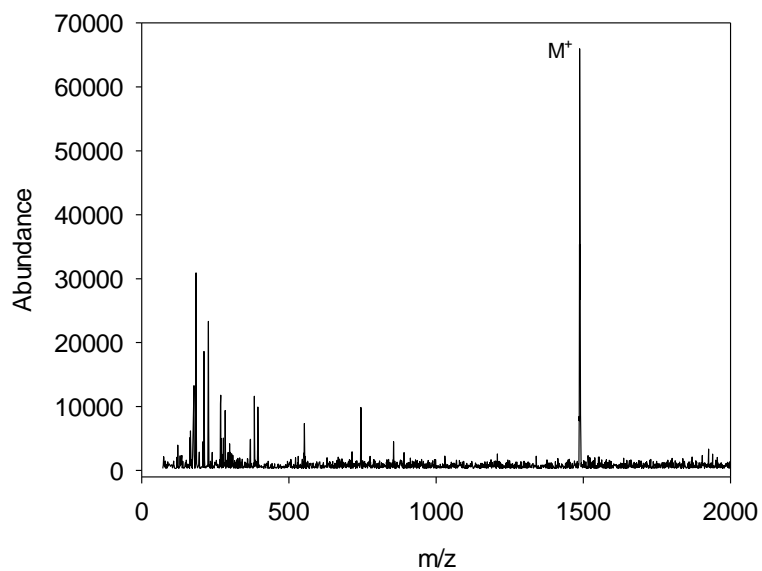

**Figure S4.** ESI MS of the light-harvesting porphyrin (**3**).

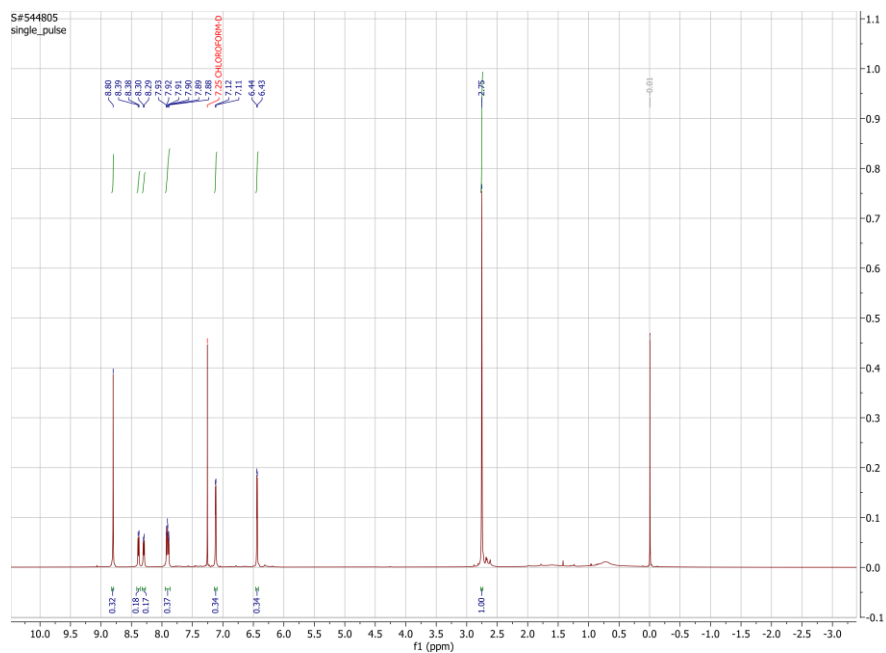

**Figure S5.** <sup>1</sup>H-NMR spectrum of [Ru<sup>II</sup>(L-Por)(CO)] (**1**) in CDCl<sub>3</sub>

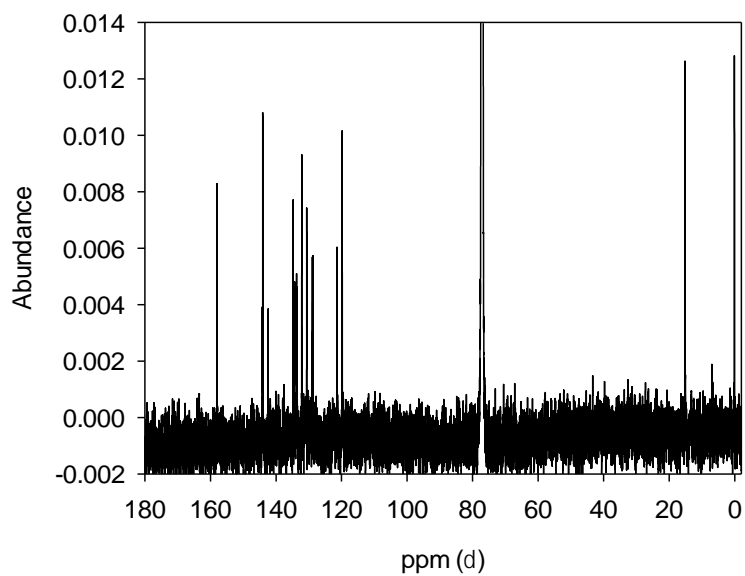

**Figure S6.**  $^{13}\text{C}$ -NMR spectrum of  $[\text{Ru}^{\text{II}}(\text{L-Por})(\text{CO})]$  (**1**).

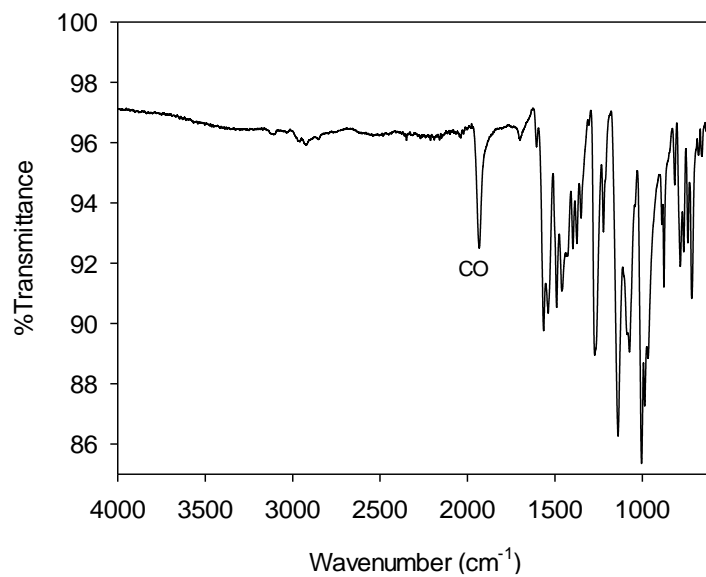

**Figure S7.** IR spectrum of  $\text{Ru}^{\text{II}}[(\text{L-Por})](\text{CO})$  (**1**).
